## Air pollution exposure when cooking with electricity compared to gas

Carlos F. Gould<sup>1,◇,\*</sup>, Lissete Dávila<sup>2,◇</sup>, M. Lorena Bejarano<sup>2</sup>, Marshall Burke<sup>1,4,5</sup>, Darby W. Jack<sup>6</sup>, Samuel B. Schlesinger<sup>3</sup>, José R. Mora<sup>7</sup>, Alfredo Valarezo<sup>2</sup>

<sup>1</sup>Doerr School of Sustainability, Stanford University

<sup>2</sup>Institute for Energy and Materials, Universidad San Francisco de Quito, Quito, Ecuador

<sup>3</sup>Independent consultant, Quito, Ecuador

<sup>4</sup>Center on Food Security and the Environment, Stanford University

<sup>5</sup>National Bureau of Economic Research

<sup>6</sup>Dept. of Environmental Health Sciences, Columbia University

<sup>7</sup>Dept. of Chemical Engineering, Universidad San Francisco de Quito, Quito 170901, Ecuador

◇These authors contributed equally.

\*Communicating author: Carlos F. Gould; Stanford University, Department of Earth System Science; 473 Via Ortega, Stanford, California 94305; [gould.cf@gmail.com](mailto:gould.cf@gmail.com); 812-322-4875

April 10, 2023

**Conflicts of Interest** The authors declare they have nothing to disclose.

**Abstract** We report small-sample evidence from a randomized experiment among a set of urban Ecuadorian households who owned both electric induction and gas stoves. We randomly assigned households to cook only with one stove during a prescribed two-day monitoring period, and then cook only with the other stove in a subsequent two-day period. The order of stove use was randomized, and air pollution was measured during each period. We found that mean 48-hour personal NO<sub>2</sub> exposure was 9.9 ppb higher (95% CI, 4.5-15.3) — a 50% increase over the 48-hour induction mean — when households were randomized to gas as compared to induction. Mean kitchen area NO<sub>2</sub> concentrations were 1 ppb higher (95% CI, 0.4-2.1) (a 6% increase) and mean personal PM<sub>2.5</sub> exposure was 11  $\mu\text{gm}^{-3}$  higher (95% CI, -0.1-22.8) (a 44% increase) during study periods when randomized to gas. We use time-resolved cooking and pollution data to illustrate that these differences are driven by LPG cooking, which was associated with a 5.0 ppb increase in 5-minute average NO<sub>2</sub> kitchen area concentrations (95% CI, 3.4-6.7) and a 20.8  $\mu\text{gm}^{-3}$  increase in 5-minute average personal PM<sub>2.5</sub> exposure (95% CI 8.9-32.6). In contrast, cooking with induction was not associated with changes to short-term NO<sub>2</sub> kitchen area concentrations, though it was associated with short-term increased personal PM<sub>2.5</sub> exposure (10.8, 95% CI, 5.7-15.9).

## Introduction

The contribution of gas cooking to indoor air pollution and health risk is important for informing policy and personal choices in both industrialized and industrializing countries, but is poorly quantified. For roughly one-third of the world who cook with biomass daily, switching to gas could reduce air pollution exposure.<sup>1</sup> However, if cooking with gas also poses health risks, electric stoves that produce no in-use emissions may be a promising ‘leapfrog’ technology that could yield both health and climate benefits, as promoted in recent household electrification initiatives.<sup>2,3</sup>

Nitrogen dioxide (NO<sub>2</sub>) exposures are of particular concern when considering gas cooking as an environmental health hazard given previous cross-sectional evidence documenting higher NO<sub>2</sub> concentrations in households using gas stoves as compared to electric ones,<sup>4,5</sup> and evidence that NO<sub>2</sub> is causally related to poor respiratory outcomes.<sup>4</sup>

Among a set of urban Ecuadorian households who owned both electric induction and gas stoves, we randomly assigned households to cook only with one stove during a prescribed two-day monitoring period, and then cook only with the other stove in a subsequent two-day period. The order of stove use was randomized, and air pollution measured during each period. This study design afforded two key analytic advantages over previous cross-sectional studies. First, participants served as their own controls, which eliminates time-invariant confounding factors like kitchen characteristics and cook-level behaviors. Since randomized interventions replacing gas with electric cooking remain rare,<sup>6</sup> existing evidence comparing households that decide to use different stoves may be biased by unobservable factors that drive both pollution differences and stove choices between households. Second, participants were already familiar with both cooking technologies, having used gas and induction for cooking for an average of 30 and 4 years; this alleviates common concerns in randomized interventions with short follow-up periods where households must adapt to a new technology and thus might not be generalizable.

## Materials and Methods

**Measurements** Data collection occurred between March 2021 and December 2021 in Quito, Ecuador. Primary cooks ( $N = 38$ ) were randomly assigned to cook with only gas or induction in the first 48-hour period and then were instructed to cook with the other stove in a subsequent 48-hour period. Our primary outcome was time-integrated personal NO<sub>2</sub> exposure, measured us-

ing passive badges (OGAWA PS-100) affixed near the breathing zone of a monitoring vest that participants were instructed to wear at all times except when bathing and sleeping. Monitoring vests also had a time-resolved, light-scattering personal fine particulate matter (PM<sub>2.5</sub>) exposure monitor (PATS+). Twelve participants were randomly selected to form an “intensive” monitoring group that included gravimetric PM<sub>2.5</sub> (Ultrasonic Personal Air Sampler) and time-resolved kitchen area NO<sub>2</sub> concentrations (AeroQual Series 500); half of this subset had duplicate NO<sub>2</sub> passive badges, which were averaged in analyses. Time-resolved stove use was determined for the assigned stove using temperature loggers and current-voltage meters for the LPG and induction stoves, respectively. Cooking was identified based on highly positive slopes over short periods of time and when > 40 degrees C or > 2.5 V; cooking and non-cooking events had minimum durations of 5 and 30 minutes, respectively.

**Statistical Analysis** We estimated the effect of stove randomization on pollution in panel fixed effects (FE) regressions via ordinary least squares (OLS). The exposure was randomized stove assignment (reference: induction). The outcome was, separately, 48-hour average personal NO<sub>2</sub> exposure, kitchen area NO<sub>2</sub> concentrations, and personal PM<sub>2.5</sub> exposure. We included FE (i.e., separate intercepts) for participant, month of year, and day of week. This intention-to-treat (ITT) analysis can be considered a lower bound of the estimate of the effect of gas cooking on pollution, since any deviation from stove assignment would attenuate the true effect.

We conducted some robustness checks. First to account for potential background pollution variations, we controlled for average ambient air pollution (NO<sub>2</sub> or PM<sub>2.5</sub>) during each monitoring period from the nearest central site monitor (typically in the same neighborhood). Second, we controlled for potential variation in pollution monitor wearing by including the fraction of observations between 6am–10pm where PATS+ movement is detected. Third, we estimated the effect of the treatment on the treated by dividing our ITT estimate by the average fraction of total minutes cooked on the assigned stove when both stoves were monitored at the same time.

We estimated the effect of cooking events on short-term changes to kitchen area NO<sub>2</sub> concentrations and personal PM<sub>2.5</sub> exposure (both rolling 5-minute means) using panel FE regressions estimated via OLS where the exposure was whether LPG or induction stove use was detected, modeled separately and jointly. Here, we included FEs for participant, month of year, day of week, hour-of-day, and, for kitchen NO<sub>2</sub>, monitor FEs.

Standard errors were clustered at the participant level and  $\alpha = 0.05$  was used to determine statistical significance everywhere.

**Ethics** Research was approved by the Institutional Review Boards at the Columbia University Medical Center and the Bioethics Committee at the Universidad San Francisco de Quito (USFQ). USFQ approved COVID-19 safety protocols for in-person activities. Participants provided informed written consent online prior to visits or provided informed written consent on the day of visits. After the study, participants were given six beverage glasses or a pitcher and were provided with a summary of their cooking and exposures.

## Results

Household characteristics are summarized in Table S1. Air pollution measurements, detected cooking events, and detected monitor wearing are summarized in Table S2. Adherence to randomization was high: participants almost exclusively used the assigned stove during the designated period and minutes cooked were comparable across randomization (Table S2, Figure S2).

Mean 48-hour personal NO<sub>2</sub> exposure was 9.9 ppb higher (95% CI, 4.5–15.3) when households were randomized to gas — a 50% increase over the induction mean (Figure 1, Table S3). Half of induction period exposure estimates fell below the World Health Organization 24-hour NO<sub>2</sub> guideline (13.29 ppb)<sup>7</sup> as compared to one in ten in the gas period. Mean kitchen area NO<sub>2</sub> concentrations were 1.1 ppb higher (95% CI, 0.4–2.1) (6% higher) and mean personal PM<sub>2.5</sub> exposure was 11.4  $\mu\text{gm}^{-3}$  higher (95% CI, -0.1–22.8) (44% higher) when randomized to gas (Table S4, S5).

Detected LPG cooking was associated with a 5.0 ppb increase (95% CI, 3.4–6.7) in 5-minute average NO<sub>2</sub> kitchen area concentrations and a 20.8  $\mu\text{gm}^{-3}$  increase (95% CI, 8.9–32.6) in 5-minute average personal PM<sub>2.5</sub> exposure (Table S6, S7). Cooking with induction was not associated with changes to short-term NO<sub>2</sub> kitchen area concentrations, but was associated with increased personal PM<sub>2.5</sub> exposure of 10.8  $\mu\text{gm}^{-3}$  (95% CI, 5.7–15.9) (Table S6, S7).

Results were robust to inclusion of device wearing and ambient air pollution as controls and alternative specifications (Tables S3, S4, S5). The effect of treatment on the treated for 48-hr personal NO<sub>2</sub> exposure was 10.3 ppb higher when households were randomized to gas, quite close to our ITT estimate.

## Discussion

Limitations of this study include its small sample size, which was budget constrained. Our confidence intervals were wide and future studies could benefit from recruiting more participants and repeating the procedure multiple times during a year. While our study has strong internal validity, our findings may not generalize to other settings (e.g., high-income countries).

We estimate an increase of roughly 10 ppb in 48-hour average NO<sub>2</sub> exposure when participants were randomized to use the gas stove as compared to induction — similar to existing evidence in levels and percent difference, though not directly comparable since most studies are cross-sectional and do not measure personal exposures.<sup>4–6</sup> Based on existing global evidence, this difference implies a 6% increase in risk of current and lifetime asthma<sup>8</sup> or a 23% increase in risk of developing childhood asthma between birth and 18 years if differences are considered to be long term<sup>9</sup> or, in the short-term, a 0.85% increase in risk of next-day mortality.<sup>10</sup>

We provide small-sample, high-quality evidence that gas cooking is associated with higher NO<sub>2</sub> exposures relative to cooking with electricity. While similar evidence has been accumulating since the 1970s, better quantifying the health co-benefits of replacing gas with induction cooking could provide further support for residential electrification efforts, as well as for individual household health-protective choices. Randomized or quasi-experimental studies at the household level with longitudinal follow-up on cooking and health are recommended to provide policy- and health-relevant causal estimates of the benefits of replacing gas with induction stoves.

## Acknowledgments

The authors acknowledge funding support from the US National Institutes of Health Common Fund through the Clean Cooking Implementation Science Network. The authors are grateful to Dr. Sam Heft-Neal for helpful figure edits and thoughtful comments from Misbath Daouda, Dr. Minghao Qiu, and members of the Stanford ECHO Lab.

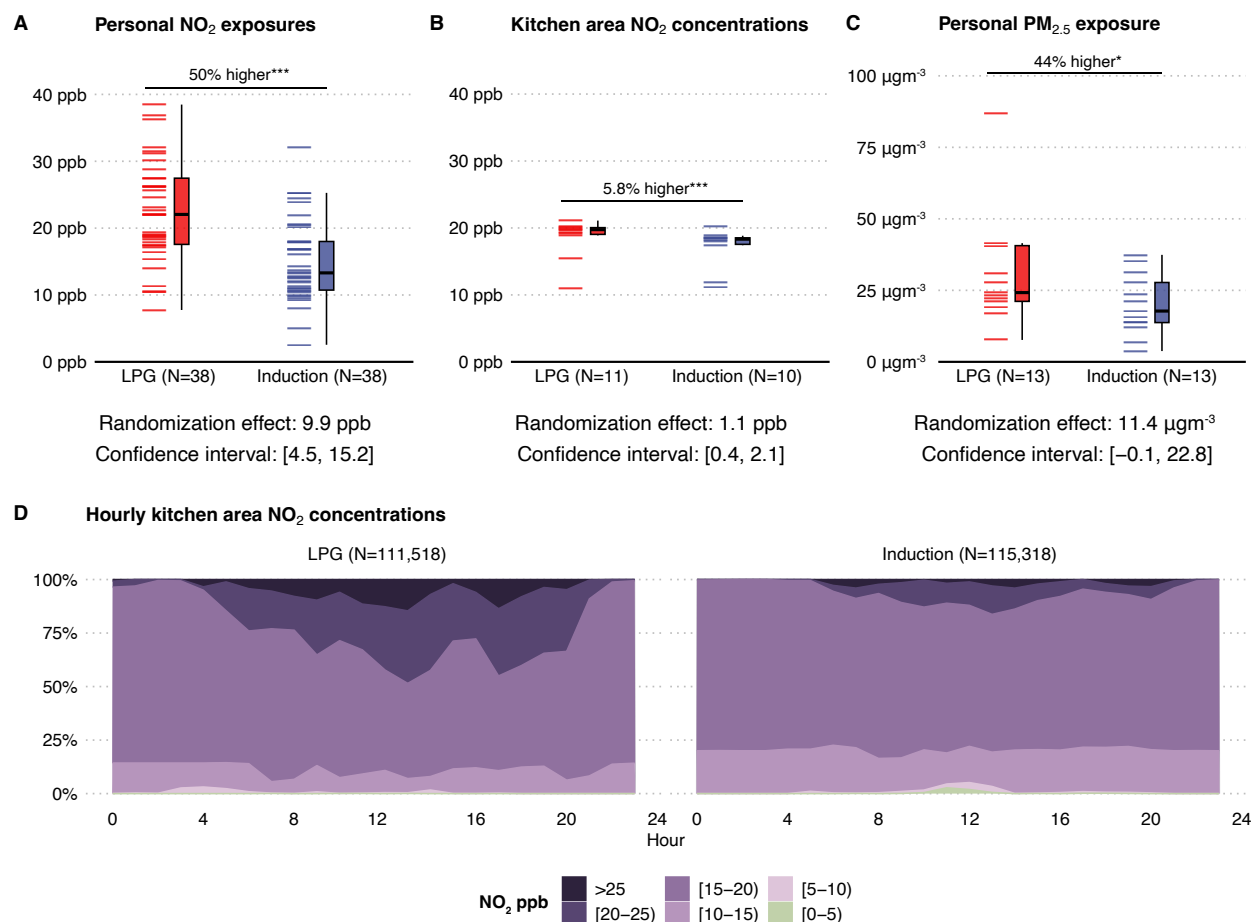

**Figure 1: Personal and kitchen area air pollution concentrations when participants were instructed to use their LPG or induction stove exclusively and effect of randomization on pollution.** In panels A–C, percent differences in means are estimated as based on the induction group average and estimated effect of randomization from the intention-to-treat analysis, which is noted below each panel along with the 95% confidence interval. Stars indicate statistical significance were  $P < 0.10 = *$ ,  $P < 0.05 = **$ ,  $P < 0.01 = ***$ .

(A) Shows integrated individual 48-hour personal NO<sub>2</sub> exposures from passive badges and summarizes them in box-and-whisker plots according to which stove participants used. Induction  $N = 38$ ; LPG  $N = 38$ .

(B) Summarizes 48-hour kitchen area NO<sub>2</sub> concentrations averaged from time-resolved data and summarizes them in box-and-whisker plots according to which stove participants used. Induction  $N = 10$ ; LPG  $N = 11$ .

(C) Shows integrated individual 48-hour personal PM<sub>2.5</sub> exposures from integrated gravimetric filter data and summarizes them in box-and-whisker plots according to which stove participants used. One observation in the LPG group is not shown and was removed from analysis based on implausibility (mean =  $513 \mu\text{gm}^{-3}$ ). Induction  $N = 13$ ; LPG  $N = 13$ .

(D) Shows the distribution of short-term (5-minute) kitchen area NO<sub>2</sub> concentrations grouped by hour of the day and stove used. Minute-resolved observations: Induction  $N = 115,318$ ; LPG  $N = 111,518$

## References

- [1] Daniel Pope, Michael Johnson, Nigel Fleeman, Kirstie Jagoe, Rui Duarte, Michelle Maden, Ramona Ludolph, Nigel Bruce, Matthew Shupler, Heather Adair-Rohani, et al. Are cleaner cooking solutions clean enough? a systematic review and meta-analysis of particulate and carbon monoxide concentrations and exposures. *Environmental Research Letters*, 16(8):083002, 2021.
- [2] Kirk R Smith. In praise of power. *Science*, 345(6197):603–603, 2014.
- [3] Johan Rockström, Owen Gaffney, Joeri Rogelj, Malte Meinshausen, Nebojsa Nakicenovic, and Hans Joachim Schellnhuber. A roadmap for rapid decarbonization. *Science*, 355(6331):1269–1271, 2017.
- [4] United States Environmental Protection Agency. Integrated Science Assessment (ISA) for Oxides of Nitrogen – Health Criteria (Final Report, Jan 2016). Reports & Assessments EPA/600/R-15/068, Research Triangle Park, North Carolina, USA, January 2016.
- [5] American Public Health Association. Gas stove emissions are a public health concern: Exposure to indoor nitrogen dioxide increases risk of illness in children, older adults, and people with underlying health conditions. Technical Report 20225, 2022.
- [6] Laura M Paulin, Gregory B Diette, Meagan Scott, Meredith C McCormack, Elizabeth C Matsui, Jean Curtin-Brosnan, DL Williams, Andrea Kidd-Taylor, Madeleine Shea, Patrick N Breyse, et al. Home interventions are effective at decreasing indoor nitrogen dioxide concentrations. *Indoor Air*, 24(4):416–424, 2014.
- [7] World Health Organization et al. Who global air quality guidelines: particulate matter (PM<sub>2.5</sub> and PM<sub>10</sub>), ozone, nitrogen dioxide, sulfur dioxide and carbon monoxide: executive summary. 2021.
- [8] Weiwei Lin, Bert Brunekreef, and Ulrike Gehring. Meta-analysis of the effects of indoor nitrogen dioxide and gas cooking on asthma and wheeze in children. *International journal of epidemiology*, 42(6):1724–1737, 2013.
- [9] Haneen Khreis, Charlotte Kelly, James Tate, Roger Parslow, Karen Lucas, and Mark Nieuwenhuijsen. Exposure to traffic-related air pollution and risk of development of childhood asthma: a systematic review and meta-analysis. *Environment international*, 100:1–31, 2017.



- [10] Xia Meng, Cong Liu, Renjie Chen, Francesco Sera, Ana Maria Vicedo-Cabrera, Ai Milojevic, Yuming Guo, Shilu Tong, Micheline de Sousa Zanotti Stagliorio Coelho, Paulo Hilario Nascimento Saldiva, et al. Short term associations of ambient nitrogen dioxide with daily total, cardiovascular, and respiratory mortality: multilocation analysis in 398 cities. *BMJ*, 372, 2021.

## Supplemental Information

**Details on NO<sub>2</sub> passive samplers** We used standard UV–visible spectrophotometry (Ogawa 2006) to analyze the passive samplers. We measured temperature and relative humidity during each sampling with a co-located sensor to assist in calculating final NO<sub>2</sub> concentrations. We calculated the limit of detection (LOD) as the mean plus three times the standard deviation of concentrations among blanks. We estimated an LOD of 1.9 ppb, similar to the other studies (Kephart et al. 2021) and the manufacturer recommended lower range of accuracy (2 ppb) (Ogawa 2006). The obtained determination coefficient for the calibration curve was 0.9997.

**Summary of air pollution measurements** Mean 48-hour personal NO<sub>2</sub> exposure was 19.8 ppb ( $n = 77$ , standard deviation [SD], 12.2), mean 48-hour kitchen area NO<sub>2</sub> concentration was 14.1 ppb ( $n = 15$ , SD, 6.1) and mean 48-hour personal PM<sub>2.5</sub> exposure was 25.0  $\mu\text{gm}^{-3}$  ( $n = 28$ , SD, 15.6) (Table S2). In paired observations, mean 48-hour personal NO<sub>2</sub> exposures were 4.0 ppb higher (95% confidence interval [CI], 0.3–7.7) than mean 48-hour kitchen area concentrations.

Nighttime pollution measurements were similar across stove assignments (Figure S3).

We observed deviations from assigned stove use during 4.4% of total cooking time when LPG and induction stove use were measured (272 out of 6243 minutes across 15 monitoring sessions). In most cases, this was detected LPG use during the induction stove use monitoring sessions. In some cases, this was both stoves being used at the same time.

### Estimating increased risk from observed exposure differences

#### *Child asthma*

Khreis et al. conducted a meta-analysis of 21 studies and generate a summarized effect estimate of an odds ratio of 1.05 (95% CI 1.02–1.07) per exposure to 4  $\mu\text{gm}^{-3}$  NO<sub>2</sub> for the development of asthma at some point between birth and 18 years of age, i.e., an increase of 5% in risk. First, we translate  $\mu\text{gm}^{-3}$  to ppb, assuming 1 atmosphere of pressure and 25 degrees Celsius temperature, using a conversion factor of 1.88  $\mu\text{gm}^{-3} = 1$  ppb. Thus, 4  $\mu\text{gm}^{-3} = 2.13$  ppb. We then divide our observed effect estimate of 9.881 ppb by 2.13 ppb and multiply this difference by 5% (from OR = 1.05). Thus, we get an estimated increase in risk of developing asthma before 18 years of age of 23%. A limitation of using this effect estimate is that the included studies are primarily from outdoor air pollution. It is not immediately clear based on existing evidence how an increase of one unit outdoor air pollution will affect personal air pollution exposures. It is plausible that

an increase of one unit outdoor air pollution will affect personal exposures somewhat less, i.e., less than one unit increase in personal exposure. In this case, we would expect an increased risk estimate of 23% to be an underestimate.

As a point of comparison, we can also draw on Lin et al.'s meta-analysis who estimate that a 15-ppb increase in indoor NO<sub>2</sub> was associated with odds of current and lifetime asthma of 1.09 (95% CI 0.91–1.31). It is worth noting that this estimate draws on only four studies. In any case, using this point estimate would yield an increased risk of 6% of developing childhood asthma.

There are a number of limitations of this approach and assumptions necessary to make inferences. For example, we must assume here that the observed 48-hour differences in this study are steady over childhood, i.e., that the difference between a child growing up in a household that uses gas vs. the counterfactual scenario where that child grows up in a household using induction is always 9.88 ppb. We must also assume that the concentration-response function is linear. A limitation of this risk assessment approach is that the difference in mean 48-hour exposures we see between stove assignment are driven by extreme peaks in exposure (i.e., exposure contrasts between gas vs. induction during cooking exceed 9.88 ppb but average out given that when no cooking occurs differences are roughly 0). The implications of these spikes in short-term exposure differences for health risk are not self-evidence. In spite of these limitations, we think it useful to provide a benchmark for implied health risk from observed effect sizes in this study.

#### *Short-term mortality*

We parallel our above approach by drawing on Meng et al.'s estimate that, on average, a 10  $\mu\text{gm}^{-3}$  increase in previous day ambient NO<sub>2</sub> concentration was associated with a 0.46% (95% confidence interval 0.36%–0.57%) increase in all-cause mortality. So, we convert 10  $\mu\text{gm}^{-3}$  to 5.32 ppb. Then, we multiply 0.46% by 9.88 divided by 5.32. Thus, we get an estimate of an increase of 0.85% in next day mortality.

Similar to above, some assumptions are required for this estimate. Namely, we assume that the concentration-response function is linear and that differences are constant (here, only for a day).

## Supplemental References

Kephart JL, Fandiño-Del-Rio M, Williams KN, Malpartida G, Lee A, Steenland K, Naeher LP, Gonzales GF, Chiang M, Checkley W, Koehler K. Nitrogen dioxide exposures from LPG stoves in a cleaner-cooking intervention trial. *Environment international*. 2021 Jan 1;146:106196.

Ogawa. NO, NO<sub>2</sub>, NO<sub>x</sub> and SO<sub>2</sub> sampling protocol using the Ogawa sampler.

Khreis H, Kelly C, Tate J, Parslow R, Lucas K, Nieuwenhuijsen M. Exposure to traffic-related air pollution and risk of development of childhood asthma: a systematic review and meta-analysis. *Environment international*. 2017 Mar 1;100:1-31.

Weiwei Lin, Bert Brunekreef, and Ulrike Gehring. Meta-analysis of the effects of indoor nitrogen dioxide and gas cooking on asthma and wheeze in children. *International journal of epidemiology*, 42(6):1724–1737, 2013.

Xia Meng, Cong Liu, Renjie Chen, Francesco Sera, Ana Maria Vicedo-Cabrera, Ai Milojevic, Yuming Guo, Shilu Tong, Micheline de Sousa Zanotti Stagliorio Coelho, Paulo Hilario Nascimento Saldiva, et al. Short term associations of ambient nitrogen dioxide with daily total, cardiovascular, and respiratory mortality: multilocation analysis in 398 cities. *BMJ*, 372, 2021.

**Table S1. Participant and household characteristics.**

|                                                             | N (%)        |
|-------------------------------------------------------------|--------------|
| Participants                                                | 38 (100%)    |
| Age of participant, Mean (SD)                               | 47.4 (15.5)  |
| Relation to head of household                               |              |
| Head of household                                           | 12 (32%)     |
| Partner                                                     | 18 (47%)     |
| Parent                                                      | 3 (8%)       |
| Child                                                       | 4 (11%)      |
| Other                                                       | 1 (3%)       |
| Gender                                                      |              |
| Man                                                         | 3 (8%)       |
| Woman                                                       | 35 (92%)     |
| Participant education                                       |              |
| Incomplete primary                                          | 4 (11%)      |
| Primary                                                     | 11 (29%)     |
| Secondary                                                   | 6 (16%)      |
| Technical school                                            | 3 (8%)       |
| University or greater                                       | 14 (37%)     |
| Adults living in the household, Mean (SD)                   | 2.97 (1.75)  |
| Children under 18 years living in the household, Mean (SD)  | 1.42 (1.33)  |
| Which stove do you consider to be your primary?             |              |
| Gas                                                         | 18 (47%)     |
| Induction                                                   | 20 (53%)     |
| Meals prepared in a typical day, Mean (SD)                  | 3.07 (0.47)  |
| Time spent cooking in a typical day                         |              |
| 1-2 hours per day                                           | 8 (57%)      |
| 2-3 hours per day                                           | 4 (29%)      |
| >3 hours per day                                            | 2 (14%)      |
| How many years ago did you purchase your current gas stove? |              |
| Mean (SD)                                                   | 10.30 (6.31) |
| How often do you use your gas stove typically?              |              |
| Several times per day                                       | 23 (62%)     |
| Once per day                                                | 6 (16%)      |
| 2-7 times per week                                          | 4 (11%)      |

|                                                           |             |
|-----------------------------------------------------------|-------------|
| Once per week                                             | 2 (5%)      |
| Less than once per week                                   | 2 (5%)      |
| Which meals do you use for your gas stove typically?      |             |
| Breakfast                                                 | 28 (74%)    |
| Lunch                                                     | 31 (82%)    |
| Dinner                                                    | 23 (61%)    |
| How frequently do you use your induction stove?           |             |
| Several times per day                                     | 18 (47%)    |
| Once per day                                              | 5 (13%)     |
| 2-7 times per week                                        | 6 (16%)     |
| Once per week                                             | 4 (11%)     |
| Less than once per week                                   | 3 (8%)      |
| Never                                                     | 1 (3%)      |
| When do you use your induction stove?                     |             |
| Morning (breakfast)                                       | 29 (76%)    |
| Afternoon (lunch)                                         | 25 (66%)    |
| Evening (dinner)                                          | 27 (71%)    |
| How many years ago did you buy your induction stove?      |             |
| Mean (SD)                                                 | 4.51 (2.05) |
| Uses biomass for cooking                                  | 4 (11%)     |
| How frequently you use biomass?                           |             |
| A few times per year                                      | 4 (100%)    |
| Did you have a power outage in the past month?            |             |
| Yes                                                       | 16 (42%)    |
| How long did the most recent power outage last?           |             |
| <15 minutes                                               | 3 (20%)     |
| 30-60 minutes                                             | 2 (13%)     |
| 1-2 hours                                                 | 2 (13%)     |
| 2-5 hours                                                 | 1 (7%)      |
| >5 hours                                                  | 7 (47%)     |
| How would you rate the electricity services in your area? |             |
| Very good                                                 | 3 (21%)     |
| Good                                                      | 5 (36%)     |
| Regular                                                   | 4 (29%)     |
| Poor                                                      | 2 (14%)     |

---

|                                                      |          |
|------------------------------------------------------|----------|
| Owns home                                            | 32 (84%) |
| Primary source of income in the household            |          |
| Formal employment                                    | 22 (58%) |
| Informal employment                                  | 10 (26%) |
| Unemployed                                           | 1 (3%)   |
| Inactive (e.g., pensioner)                           | 5 (13%)  |
| Has other source of income                           | 15 (39%) |
| What is the typical monthly income in the household? |          |
| <200 USD                                             | 5 (13%)  |
| 201-500 USD                                          | 9 (24%)  |
| 501-800 USD                                          | 6 (16%)  |
| 801-1200 USD                                         | 5 (13%)  |
| >1200-1800 USD                                       | 9 (24%)  |
| Did not respond                                      | 4 (11%)  |
| Stove has ventilation, N (%)                         |          |
| None                                                 | 26 (68%) |
| Overhead mechanical ventilation                      | 12 (32%) |
| Kitchen is a separate room, N (%)                    | 16 (42%) |
| Kitchen windows, N (%)                               |          |
| 0                                                    | 10 (26%) |
| 1                                                    | 23 (61%) |
| 2+                                                   | 5 (13%)  |

---

Table S2: **Descriptive statistics of study variables.**

|                                                                            | Overall (N=76)          | LPG (N=38)              | Induction (N=38)        |
|----------------------------------------------------------------------------|-------------------------|-------------------------|-------------------------|
| Randomly assigned as first period                                          |                         | 18                      | 20                      |
| Ambient 48-hour mean NO <sub>2</sub> concentrations, ppb                   |                         |                         |                         |
| Observations                                                               | 76                      | 38                      | 38                      |
| Mean (SD)                                                                  | 16.24 (5.43)            | 16.89 (5.80)            | 15.58 (5.02)            |
| Median (IQR)                                                               | 16.13 (14.18, 19.11)    | 17.29 (14.98, 20.51)    | 15.32 (13.83, 18.37)    |
| Ambient 48-hour mean PM <sub>2.5</sub> concentrations, $\mu\text{gm}^{-3}$ |                         |                         |                         |
| Observations                                                               | 76                      | 38                      | 38                      |
| Mean (SD)                                                                  | 13.41 (2.58)            | 13.42 (2.46)            | 13.41 (2.73)            |
| Median (IQR)                                                               | 13.25 (11.56, 14.95)    | 12.94 (12.02, 14.84)    | 13.57 (10.93, 15.14)    |
| Mean 48-hour personal NO <sub>2</sub> exposure, ppb                        |                         |                         |                         |
| Observations                                                               | 76                      | 38                      | 38                      |
| Mean (SD)                                                                  | 19.76 (12.28)           | 24.52 (14.86)           | 15.00 (6.18)            |
| Median (IQR)                                                               | 17.90 (12.37, 24.51)    | 22.05 (17.57, 27.47)    | 13.31 (10.73, 18.00)    |
| Mean 48-hour kitchen area NO <sub>2</sub> concentrations, ppb              |                         |                         |                         |
| Observations                                                               | 21                      | 11                      | 10                      |
| Mean (SD)                                                                  | 17.91 (3.00)            | 18.63 (2.93)            | 17.12 (3.03)            |
| Median (IQR)                                                               | 18.84 (17.95, 19.86)    | 19.75 (19.04, 20.05)    | 18.33 (17.55, 18.52)    |
| Mean 48-hour personal PM <sub>2.5</sub> exposure, $\mu\text{gm}^{-3}$      |                         |                         |                         |
| Observations                                                               | 25                      | 12                      | 13                      |
| Mean (SD)                                                                  | 24.91 (16.45)           | 30.21 (20.24)           | 20.02 (10.55)           |
| Median (IQR)                                                               | 22.46 (15.80, 31.18)    | 23.76 (20.62, 33.54)    | 17.76 (13.73, 27.75)    |
| Personal PM <sub>2.5</sub> monitor temperature, degrees C                  |                         |                         |                         |
| Observations                                                               | 74                      | 37                      | 37                      |
| Mean (SD)                                                                  | 21.20 (1.87)            | 21.24 (1.82)            | 21.17 (1.94)            |
| Median (IQR)                                                               | 21.45 (19.95, 22.62)    | 21.42 (19.73, 22.70)    | 21.64 (20.09, 22.47)    |
| Detected personal PM <sub>2.5</sub> monitor motion, minutes                |                         |                         |                         |
| Observations                                                               | 76                      | 38                      | 38                      |
| Mean (SD)                                                                  | 335.50 (188.78)         | 352.33 (178.15)         | 318.66 (199.80)         |
| Median (IQR)                                                               | 343.50 (176.50, 441.75) | 377.00 (199.12, 436.75) | 294.50 (137.50, 446.75) |
| Detected LPG cooking, minutes                                              |                         |                         |                         |
| Observations                                                               | 38                      | 38                      | 38                      |
| Mean (SD)                                                                  | 279.42 (136.41)         | 279.42 (136.41)         | 7.95 (25.85)            |
| Median (IQR)                                                               | 262.00 (172.75, 381.50) | 262.00 (172.75, 381.50) | 0.00 (0.00, 0.00)       |
| Detected induction cooking, minutes                                        |                         |                         |                         |
| Observations                                                               | 38                      | 38                      | 38                      |
| Mean (SD)                                                                  | 284.37 (147.21)         | 1.34 (8.27)             | 284.37 (147.21)         |
| Median (IQR)                                                               | 289.00 (161.25, 368.75) | 0.00 (0.00, 0.00)       | 289.00 (161.25, 368.75) |



**Table S3: Association between assignment to using the LPG stove and two-day average personal NO<sub>2</sub> exposure.**

| Dependent Variable:<br>Model:                                    | (1)                 | (2)                 | Personal NO <sub>2</sub> exposure (ppb) |                     |                     |                     | (7)                 |
|------------------------------------------------------------------|---------------------|---------------------|-----------------------------------------|---------------------|---------------------|---------------------|---------------------|
|                                                                  |                     |                     | (3)                                     | (4)                 | (5)                 | (6)                 |                     |
| <i>Variables</i>                                                 |                     |                     |                                         |                     |                     |                     |                     |
| LPG                                                              | 9.518***<br>(2.495) | 9.868***<br>(3.030) | 9.051***<br>(2.068)                     | 9.907***<br>(2.679) | 9.197***<br>(2.513) | 9.566***<br>(3.196) | 8.727***<br>(3.039) |
| <i>Controls</i>                                                  |                     |                     |                                         |                     |                     |                     |                     |
| daytime device wearing<br>ambient NO <sub>2</sub> concentrations |                     |                     |                                         |                     | Yes                 | Yes                 | Yes                 |
| <i>Fixed-effects</i>                                             |                     |                     |                                         |                     |                     |                     |                     |
| participant (38)                                                 | Yes                 | Yes                 | Yes                                     | Yes                 | Yes                 | Yes                 | Yes                 |
| month (7)                                                        |                     | Yes                 |                                         | Yes                 | Yes                 | Yes                 | Yes                 |
| day of week (6)                                                  |                     |                     | Yes                                     | Yes                 | Yes                 | Yes                 | Yes                 |
| <i>Fit statistics</i>                                            |                     |                     |                                         |                     |                     |                     |                     |
| Observations                                                     | 76                  | 76                  | 76                                      | 76                  | 76                  | 74                  | 74                  |
| R <sup>2</sup>                                                   | 0.61805             | 0.63778             | 0.63082                                 | 0.65465             | 0.66369             | 0.66595             | 0.67212             |
| Within R <sup>2</sup>                                            | 0.28498             | 0.27348             | 0.25678                                 | 0.26895             | 0.28810             | 0.24251             | 0.25649             |

*Clustered (participant) standard-errors in parentheses*

*Signif. Codes: \*\*\*: 0.01, \*\*: 0.05, \*: 0.1*

**Table S4: Association between assignment to using the LPG stove and two-day average kitchen area NO<sub>2</sub> concentrations.**

| Dependent Variable:                                              | Kitchen area NO <sub>2</sub> (ppb) |                  |                     |                   |                  |                     |                     |
|------------------------------------------------------------------|------------------------------------|------------------|---------------------|-------------------|------------------|---------------------|---------------------|
| LPG                                                              | 2.295**<br>(0.7702)                | 2.243<br>(1.303) | 2.311**<br>(0.8981) | 2.494*<br>(1.317) | 2.705<br>(1.748) | 1.070**<br>(0.4118) | 1.328**<br>(0.5019) |
| <i>Controls</i>                                                  |                                    |                  |                     |                   |                  |                     |                     |
| daytime device wearing<br>ambient NO <sub>2</sub> concentrations |                                    |                  |                     |                   | Yes              | Yes                 | Yes                 |
| <i>Fixed-effects</i>                                             |                                    |                  |                     |                   |                  |                     |                     |
| participant (11)                                                 | Yes                                | Yes              | Yes                 | Yes               | Yes              | Yes                 | Yes                 |
| month (7)                                                        |                                    | Yes              |                     | Yes               | Yes              | Yes                 | Yes                 |
| day of week (5)                                                  |                                    |                  | Yes                 | Yes               | Yes              | Yes                 | Yes                 |
| <i>Fit statistics</i>                                            |                                    |                  |                     |                   |                  |                     |                     |
| Observations                                                     | 21                                 | 21               | 21                  | 21                | 21               | 20                  | 20                  |
| R <sup>2</sup>                                                   | 0.85793                            | 0.86363          | 0.88437             | 0.94047           | 0.94217          | 0.96878             | 0.99531             |
| Within R <sup>2</sup>                                            | 0.50692                            | 0.41738          | 0.47647             | NaN               | NaN              | 0.84323             | 0.97643             |

*Clustered (participant) standard-errors in parentheses*

*Signif. Codes: \*\*\*: 0.01, \*\*: 0.05, \*: 0.1*

**Table S5: Association between assignment to using the LPG stove and two-day average personal PM<sub>2.5</sub> exposure.**

| Dependent Variable:<br>Model:                               | (1)               | (2)              | (3)               | (4)               | (5)               | (6)              | (7)              | (8)               | (9)               |
|-------------------------------------------------------------|-------------------|------------------|-------------------|-------------------|-------------------|------------------|------------------|-------------------|-------------------|
| Personal PM <sub>2.5</sub> exposure ( $\mu\text{gm}^{-3}$ ) |                   |                  |                   |                   |                   |                  |                  |                   |                   |
| <i>Variables</i>                                            |                   |                  |                   |                   |                   |                  |                  |                   |                   |
| LPG                                                         | 11.46*<br>(5.997) | 12.71<br>(8.171) | 8.719*<br>(4.600) | 11.35*<br>(5.340) | 12.52*<br>(6.439) | 13.88<br>(8.604) | 9.974<br>(7.062) | 13.72*<br>(7.252) | 13.24*<br>(6.950) |
| <i>Controls</i>                                             |                   |                  |                   |                   |                   |                  |                  |                   |                   |
| daytime device wearing                                      |                   |                  |                   |                   |                   | Yes              | Yes              | Yes               |                   |
| ambient NO <sub>2</sub> concentrations                      |                   |                  |                   |                   | Yes               |                  | Yes              | Yes               |                   |
| <i>Fixed-effects</i>                                        |                   |                  |                   |                   |                   |                  |                  |                   |                   |
| participant (13)                                            | Yes               | Yes              | Yes               | Yes               | Yes               | Yes              | Yes              | Yes               | Yes               |
| month (7)                                                   |                   | Yes              |                   | Yes               |                   | Yes              |                  |                   |                   |
| day of week (5)                                             |                   |                  | Yes               | Yes               |                   |                  | Yes              |                   |                   |
| <i>Fit statistics</i>                                       |                   |                  |                   |                   |                   |                  |                  |                   |                   |
| Observations                                                | 25                | 25               | 25                | 25                | 25                | 25               | 25               | 24                | 24                |
| R <sup>2</sup>                                              | 0.64716           | 0.66373          | 0.73694           | 0.79814           | 0.69604           | 0.71843          | 0.78134          | 0.65662           | 0.69466           |
| Within R <sup>2</sup>                                       | 0.25589           | 0.27013          | 0.09539           | 0.16426           | 0.35897           | 0.38885          | 0.24806          | 0.28942           | 0.36814           |

*Clustered (participant) standard-errors in parentheses*  
*Signif. Codes: \*\*\*: 0.01, \*\*: 0.05, \*: 0.1*

**Table S6: Association between detected cooking events and 5-minute average air pollution concentrations.**

| Dependent Variables:  | 5-min mean kitchen area NO <sub>2</sub> concentrations (ppb) |                    | 5-min mean personal PM <sub>2.5</sub> exposures ( $\mu\text{gm}^{-3}$ ) |                     |
|-----------------------|--------------------------------------------------------------|--------------------|-------------------------------------------------------------------------|---------------------|
| Model:                | (1)                                                          | (2)                | (3)                                                                     | (4)                 |
| <i>Variables</i>      |                                                              |                    |                                                                         |                     |
| LPG cooking           | 4.642***<br>(0.6685)                                         |                    | 22.22***<br>(6.810)                                                     |                     |
| Induction cooking     |                                                              | 0.1879<br>(0.5566) |                                                                         | 11.40***<br>(3.854) |
| <i>Fixed-effects</i>  |                                                              |                    |                                                                         |                     |
| Participant           | Yes                                                          | Yes                | Yes                                                                     | Yes                 |
| Hour of day (24)      | Yes                                                          | Yes                | Yes                                                                     | Yes                 |
| Day of week (7)       | Yes                                                          | Yes                | Yes                                                                     | Yes                 |
| Month of year         | Yes                                                          | Yes                | Yes                                                                     | Yes                 |
| NO2 Monitor           | Yes                                                          | Yes                |                                                                         |                     |
| <i>Fit statistics</i> |                                                              |                    |                                                                         |                     |
| # Participant         | 11                                                           | 10                 | 38                                                                      | 37                  |
| # month               | 7                                                            | 6                  | 7                                                                       | 7                   |
| # 'Monitor ID'        | 4                                                            | 3                  | –                                                                       | –                   |
| Observations          | 40,085                                                       | 43,485             | 127,729                                                                 | 131,770             |
| R <sup>2</sup>        | 0.65710                                                      | 0.70650            | 0.20833                                                                 | 0.08579             |
| Within R <sup>2</sup> | 0.32370                                                      | 0.00068            | 0.01181                                                                 | 0.00526             |

*Clustered (participant) standard-errors in parentheses*

*Signif. Codes: \*\*\*: 0.01, \*\*: 0.05, \*: 0.1*

**Table S7: Effect of cooking on pollution during sessions with both induction and LPG stove monitoring.**

| Dependent Variables:  | 5-min mean kitchen area NO <sub>2</sub> concentrations (ppb) | 5-min mean personal PM <sub>2.5</sub> exposures ( $\mu\text{gm}^{-3}$ ) |
|-----------------------|--------------------------------------------------------------|-------------------------------------------------------------------------|
| Model:                | (1)                                                          | (2)                                                                     |
| <i>Variables</i>      |                                                              |                                                                         |
| Induction cooking     | -0.3957**<br>(0.1424)                                        | 3.814<br>(2.303)                                                        |
| LPG cooking           | 4.193***<br>(0.5053)                                         | 30.87**<br>(13.06)                                                      |
| <i>Fixed-effects</i>  |                                                              |                                                                         |
| Participant           | Yes                                                          | Yes                                                                     |
| Hour of day (24)      | Yes                                                          | Yes                                                                     |
| Day of week (7)       | Yes                                                          | Yes                                                                     |
| Month of year (6)     | Yes                                                          | Yes                                                                     |
| NO2 Monitor (2)       | Yes                                                          |                                                                         |
| <i>Fit statistics</i> |                                                              |                                                                         |
| # Participants        | 7                                                            | 15                                                                      |
| Observations          | 55,944                                                       | 46,369                                                                  |
| R <sup>2</sup>        | 0.50035                                                      | 0.13604                                                                 |
| Within R <sup>2</sup> | 0.34363                                                      | 0.02924                                                                 |

*Clustered (participant) standard-errors in parentheses*  
*Signif. Codes: \*\*\*: 0.01, \*\*: 0.05, \*: 0.1*

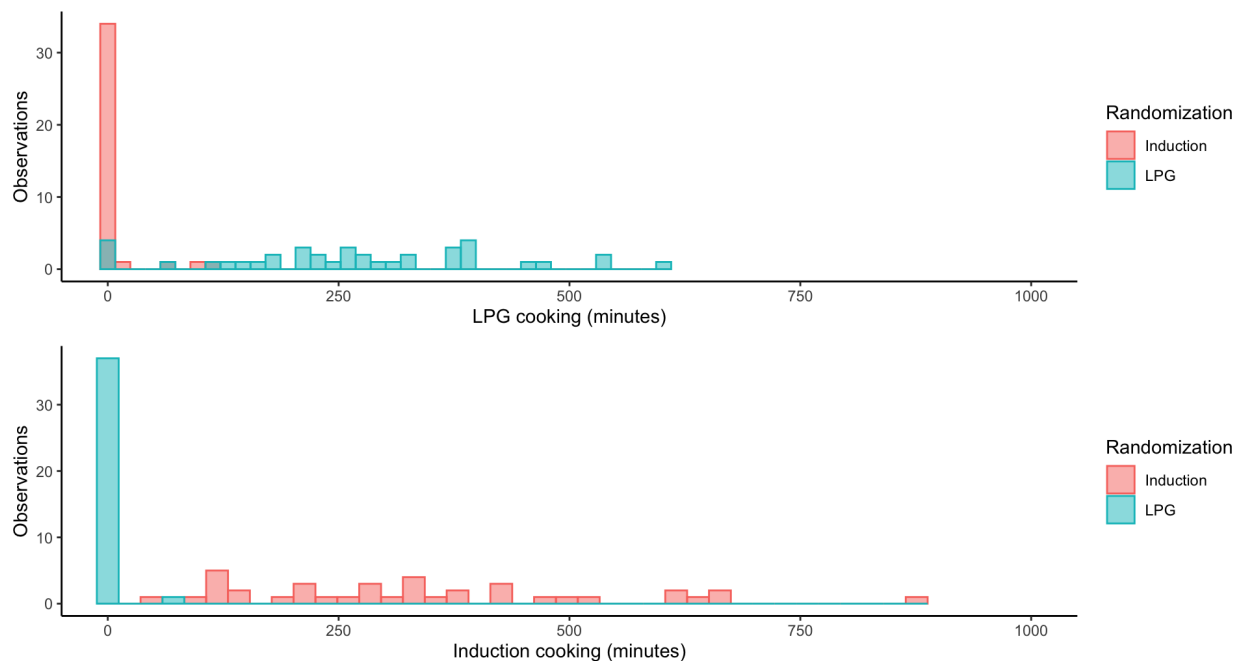

**Figure S2: Minutes of detected LPG and induction stove use by randomization.** In total, we observed deviations from assigned stove use during 4.4% of total cooking time when LPG and induction stove use were measured (272 out of 6243 minutes across 15 monitoring sessions).

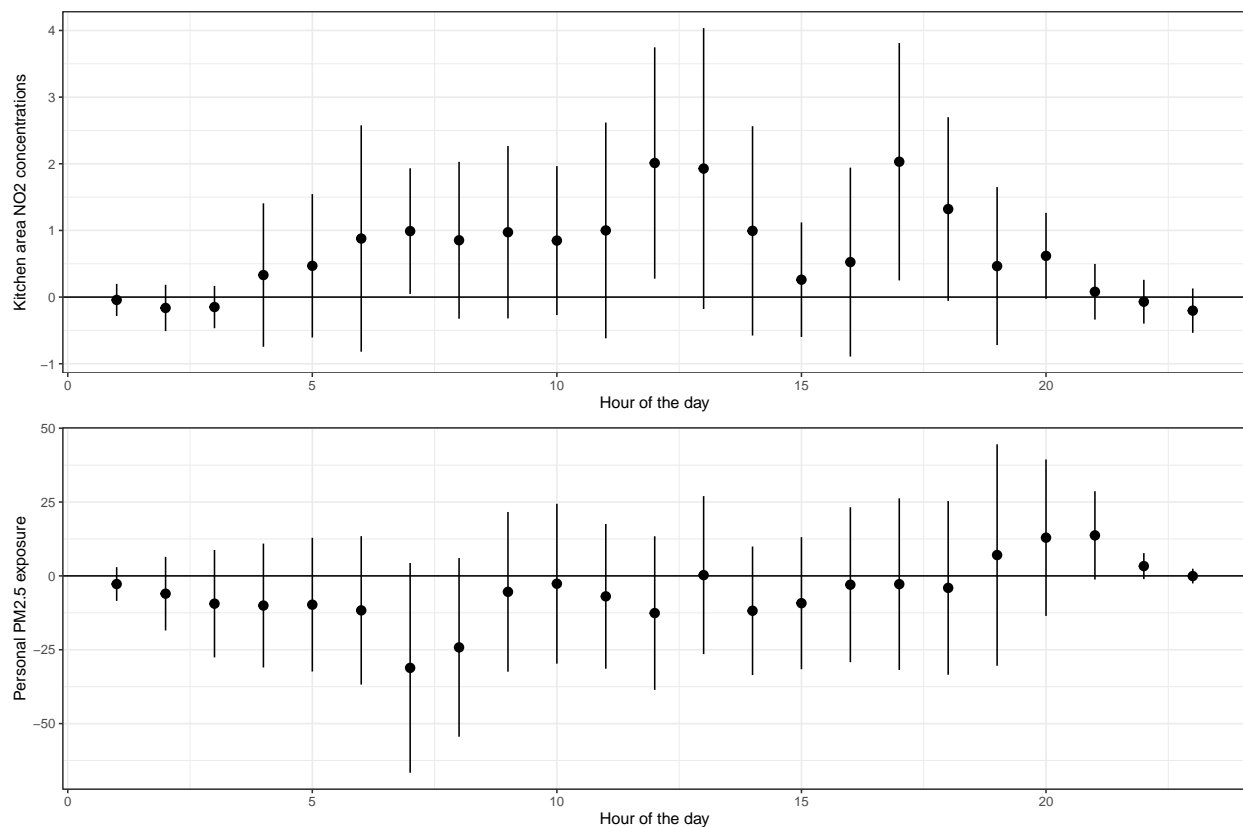

**Figure S3: Hour-wise estimates of the difference between kitchen area NO<sub>2</sub> concentrations and personal PM<sub>2.5</sub> exposures when households were randomized to use gas vs. induction.** Coefficients and 95% confidence intervals are displayed from a regression that interacts randomized stove assigned with hour of the day, controlling for participant, day of week, and month fixed effects (the NO<sub>2</sub> regression accounts for monitor FE). Standard errors clustered at participant level. Estimates that are above zero indicate that average pollution was higher when the household was randomized to use gas.
